# Supplementary material for: Ensemble Models Predict Invasive Bee Habitat Suitability Will Expand under Future Climate Scenarios in Hawai’i
Source: MDPI journal article supplement (doi:10.3390/insects12050443), 2021-05-13
Supplement: s1 [file s1]

**Supplementary Table S1.** Bee specimen records evaluated from the Global Biodiversity Information Facility (<http://gbif.org>) and their respective DOIs across species-specific data downloads.

| Species                           | DOI                                                                                 |
|-----------------------------------|-------------------------------------------------------------------------------------|
| <i>Apis mellifera</i>             | <a href="https://doi.org/10.15468/dl.tqfxlt">https://doi.org/10.15468/dl.tqfxlt</a> |
| <i>Ceratina arizonensis</i>       | <a href="https://doi.org/10.15468/dl.yk7ttv">https://doi.org/10.15468/dl.yk7ttv</a> |
| <i>Ceratina dentipes</i>          | <a href="https://doi.org/10.15468/dl.pcida6">https://doi.org/10.15468/dl.pcida6</a> |
| <i>Ceratina smaragdula</i>        | <a href="https://doi.org/10.15468/dl.plwhz0">https://doi.org/10.15468/dl.plwhz0</a> |
| <i>Hylaeus albonitens</i>         | <a href="https://doi.org/10.15468/dl.3l2lg5">https://doi.org/10.15468/dl.3l2lg5</a> |
| <i>Hylaeus leptcephalus</i>       | <a href="https://doi.org/10.15468/dl.j94onx">https://doi.org/10.15468/dl.j94onx</a> |
| <i>Hylaeus strenuus</i>           | <a href="https://doi.org/10.15468/dl.nwqqf1">https://doi.org/10.15468/dl.nwqqf1</a> |
| <i>Lasioglossum impavidum</i>     | <a href="https://doi.org/10.15468/dl.dbnlm5">https://doi.org/10.15468/dl.dbnlm5</a> |
| <i>Lasioglossum microlepoides</i> | <a href="https://doi.org/10.15468/dl.d2nnu8">https://doi.org/10.15468/dl.d2nnu8</a> |
| <i>Lasioglossum puteulanum</i>    | <a href="https://doi.org/10.15468/dl.lcirmt">https://doi.org/10.15468/dl.lcirmt</a> |
| <i>Lithurgus scabrosus</i>        | <a href="https://doi.org/10.15468/dl.6mzy2w">https://doi.org/10.15468/dl.6mzy2w</a> |
| <i>Megachile chlorura</i>         | <a href="https://doi.org/10.15468/dl.62huck">https://doi.org/10.15468/dl.62huck</a> |
| <i>Megachile diligens</i>         | <a href="https://doi.org/10.15468/dl.x3u6uh">https://doi.org/10.15468/dl.x3u6uh</a> |
| <i>Megachile fullawayi</i>        | <a href="https://doi.org/10.15468/dl.8geeyr">https://doi.org/10.15468/dl.8geeyr</a> |
| <i>Megachile gentilis</i>         | <a href="https://doi.org/10.15468/dl.kr6itq">https://doi.org/10.15468/dl.kr6itq</a> |
| <i>Megachile lantana</i>          | <a href="https://doi.org/10.15468/dl.knz6hf">https://doi.org/10.15468/dl.knz6hf</a> |
| <i>Megachile polcaris</i>         | <a href="https://doi.org/10.15468/dl.ebxepw">https://doi.org/10.15468/dl.ebxepw</a> |
| <i>Megachile timberlakei</i>      | <a href="https://doi.org/10.15468/dl.ed7jha">https://doi.org/10.15468/dl.ed7jha</a> |
| <i>Megachile umbripennis</i>      | <a href="https://doi.org/10.15468/dl.v3ld4z">https://doi.org/10.15468/dl.v3ld4z</a> |
| <i>Xylocopa sonorina</i>          | <a href="https://doi.org/10.15468/dl.nnr2q5">https://doi.org/10.15468/dl.nnr2q5</a> |

**Supplementary Table S2.** Bee specimen records evaluated from the American Museum of Natural History to determine their capacity for informing SDMs across their (a) native and (b) non-native Hawai'i distribution. Not all records could be used as they did not provide publicly available georeferenced data on the website.

**(a) Native records.**

| ID | Species                  | Institution                                                                                                                                                                                      |
|----|--------------------------|--------------------------------------------------------------------------------------------------------------------------------------------------------------------------------------------------|
| 1  | <i>Ceratina dentipes</i> | American Museum of Natural History, Bee specimen record database.<br><a href="https://www.discoverlife.org/mp/20l?id=AMNH_BEES108761">https://www.discoverlife.org/mp/20l?id=AMNH_BEES108761</a> |
| 2  |                          | American Museum of Natural History, Bee specimen record database.<br><a href="https://www.discoverlife.org/mp/20l?id=AMNH_BEES108731">https://www.discoverlife.org/mp/20l?id=AMNH_BEES108731</a> |
| 3  |                          | American Museum of Natural History, Bee specimen record database.<br><a href="https://www.discoverlife.org/mp/20l?id=AMNH_BEES108727">https://www.discoverlife.org/mp/20l?id=AMNH_BEES108727</a> |
| 4  |                          | American Museum of Natural History, Bee specimen record database.<br><a href="https://www.discoverlife.org/mp/20l?id=AMNH_BEES108738">https://www.discoverlife.org/mp/20l?id=AMNH_BEES108738</a> |
| 5  |                          | American Museum of Natural History, Bee specimen record database.<br><a href="https://www.discoverlife.org/mp/20l?id=AMNH_BEES108737">https://www.discoverlife.org/mp/20l?id=AMNH_BEES108737</a> |

6 American Museum of Natural History, Bee specimen record database.  
[https://www.discoverlife.org/mp/20l?id=AMNH\\_BEES108792](https://www.discoverlife.org/mp/20l?id=AMNH_BEES108792)

7 American Museum of Natural History, Bee specimen record database.  
[https://www.discoverlife.org/mp/20l?id=AMNH\\_BEES108794](https://www.discoverlife.org/mp/20l?id=AMNH_BEES108794)

8 American Museum of Natural History, Bee specimen record database.  
[https://www.discoverlife.org/mp/20l?id=AMNH\\_BEES108795](https://www.discoverlife.org/mp/20l?id=AMNH_BEES108795)

9 American Museum of Natural History, Bee specimen record database.  
[https://www.discoverlife.org/mp/20l?id=AMNH\\_BEES108791](https://www.discoverlife.org/mp/20l?id=AMNH_BEES108791)

10 American Museum of Natural History, Bee specimen record database.  
[https://www.discoverlife.org/mp/20l?id=AMNH\\_BEES108730](https://www.discoverlife.org/mp/20l?id=AMNH_BEES108730)

11 American Museum of Natural History, Bee specimen record database.  
[https://www.discoverlife.org/mp/20l?id=AMNH\\_BEES108729](https://www.discoverlife.org/mp/20l?id=AMNH_BEES108729)

12 American Museum of Natural History, Bee specimen record database.  
[https://www.discoverlife.org/mp/20l?id=AMNH\\_BEES108790](https://www.discoverlife.org/mp/20l?id=AMNH_BEES108790)

13 American Museum of Natural History, Bee specimen record database.  
[https://www.discoverlife.org/mp/20l?id=AMNH\\_BEES108787](https://www.discoverlife.org/mp/20l?id=AMNH_BEES108787)

14 American Museum of Natural History, Bee specimen record database.  
[https://www.discoverlife.org/mp/20l?id=AMNH\\_BEES108789](https://www.discoverlife.org/mp/20l?id=AMNH_BEES108789)

15 American Museum of Natural History, Bee specimen record database.  
[https://www.discoverlife.org/mp/20l?id=AMNH\\_BEES108796](https://www.discoverlife.org/mp/20l?id=AMNH_BEES108796)

16 American Museum of Natural History, Bee specimen record database.  
[https://www.discoverlife.org/mp/20l?id=AMNH\\_BEES108793](https://www.discoverlife.org/mp/20l?id=AMNH_BEES108793)

17 American Museum of Natural History, Bee specimen record database.  
[https://www.discoverlife.org/mp/20l?id=AMNH\\_BEES108806](https://www.discoverlife.org/mp/20l?id=AMNH_BEES108806)

18 American Museum of Natural History, Bee specimen record database.  
[https://www.discoverlife.org/mp/20l?id=AMNH\\_BEES108797](https://www.discoverlife.org/mp/20l?id=AMNH_BEES108797)

19 American Museum of Natural History, Bee specimen record database.  
[https://www.discoverlife.org/mp/20l?id=AMNH\\_BEES108798](https://www.discoverlife.org/mp/20l?id=AMNH_BEES108798)

20 American Museum of Natural History, Bee specimen record database.  
[https://www.discoverlife.org/mp/20l?id=AMNH\\_BEES108772](https://www.discoverlife.org/mp/20l?id=AMNH_BEES108772)

21 American Museum of Natural History, Bee specimen record database.  
[https://www.discoverlife.org/mp/20l?id=AMNH\\_BEES108769](https://www.discoverlife.org/mp/20l?id=AMNH_BEES108769)

22 American Museum of Natural History, Bee specimen record database.  
[https://www.discoverlife.org/mp/20l?id=AMNH\\_BEES108771](https://www.discoverlife.org/mp/20l?id=AMNH_BEES108771)

23 American Museum of Natural History, Bee specimen record database.  
[https://www.discoverlife.org/mp/20l?id=AMNH\\_BEES108767](https://www.discoverlife.org/mp/20l?id=AMNH_BEES108767)

24 iNaturalist.org: iNaturalist research-grade observations  
<https://www.discoverlife.org/mp/20l?id=INAT32613351>

25 American Museum of Natural History, Bee specimen record database.  
[https://www.discoverlife.org/mp/20l?id=AMNH\\_BEES108768](https://www.discoverlife.org/mp/20l?id=AMNH_BEES108768)

26 American Museum of Natural History, Bee specimen record database.  
[https://www.discoverlife.org/mp/20l?id=AMNH\\_BEES108742](https://www.discoverlife.org/mp/20l?id=AMNH_BEES108742)

27 American Museum of Natural History, Bee specimen record database.  
[https://www.discoverlife.org/mp/20l?id=AMNH\\_BEES108750](https://www.discoverlife.org/mp/20l?id=AMNH_BEES108750)

28 American Museum of Natural History, Bee specimen record database.  
[https://www.discoverlife.org/mp/20l?id=AMNH\\_BEES108743](https://www.discoverlife.org/mp/20l?id=AMNH_BEES108743)

|    |                                                                                                                                                                                                                                                                                                                                                                                                                                                                                                                                                                                                                                                                                                                                                                                                                                                                                                                                                                                                                                                                                                                                                                                                                                                                                                                                                                                                                                                                                                                                                                                                                                                                                                                                                                                                                                                                                                                                                                                                                                                                                                                                                                                                                                                                                       |
|----|---------------------------------------------------------------------------------------------------------------------------------------------------------------------------------------------------------------------------------------------------------------------------------------------------------------------------------------------------------------------------------------------------------------------------------------------------------------------------------------------------------------------------------------------------------------------------------------------------------------------------------------------------------------------------------------------------------------------------------------------------------------------------------------------------------------------------------------------------------------------------------------------------------------------------------------------------------------------------------------------------------------------------------------------------------------------------------------------------------------------------------------------------------------------------------------------------------------------------------------------------------------------------------------------------------------------------------------------------------------------------------------------------------------------------------------------------------------------------------------------------------------------------------------------------------------------------------------------------------------------------------------------------------------------------------------------------------------------------------------------------------------------------------------------------------------------------------------------------------------------------------------------------------------------------------------------------------------------------------------------------------------------------------------------------------------------------------------------------------------------------------------------------------------------------------------------------------------------------------------------------------------------------------------|
| 29 | American Museum of Natural History, Bee specimen record database.<br><a href="https://www.discoverlife.org/mp/20l?id=AMNH_BEES108745">https://www.discoverlife.org/mp/20l?id=AMNH_BEES108745</a>                                                                                                                                                                                                                                                                                                                                                                                                                                                                                                                                                                                                                                                                                                                                                                                                                                                                                                                                                                                                                                                                                                                                                                                                                                                                                                                                                                                                                                                                                                                                                                                                                                                                                                                                                                                                                                                                                                                                                                                                                                                                                      |
| 30 | York University CCDB-01563 G10<br><a href="https://www.discoverlife.org/mp/20l?id=BOLD_BOWGF367_09">https://www.discoverlife.org/mp/20l?id=BOLD_BOWGF367_09</a>                                                                                                                                                                                                                                                                                                                                                                                                                                                                                                                                                                                                                                                                                                                                                                                                                                                                                                                                                                                                                                                                                                                                                                                                                                                                                                                                                                                                                                                                                                                                                                                                                                                                                                                                                                                                                                                                                                                                                                                                                                                                                                                       |
| 31 | American Museum of Natural History, Bee specimen record database.<br><a href="https://www.discoverlife.org/mp/20l?id=AMNH_BEES108765">https://www.discoverlife.org/mp/20l?id=AMNH_BEES108765</a>                                                                                                                                                                                                                                                                                                                                                                                                                                                                                                                                                                                                                                                                                                                                                                                                                                                                                                                                                                                                                                                                                                                                                                                                                                                                                                                                                                                                                                                                                                                                                                                                                                                                                                                                                                                                                                                                                                                                                                                                                                                                                      |
| 32 | American Museum of Natural History, Bee specimen record database.<br><a href="https://www.discoverlife.org/mp/20l?id=AMNH_BEES108740">https://www.discoverlife.org/mp/20l?id=AMNH_BEES108740</a>                                                                                                                                                                                                                                                                                                                                                                                                                                                                                                                                                                                                                                                                                                                                                                                                                                                                                                                                                                                                                                                                                                                                                                                                                                                                                                                                                                                                                                                                                                                                                                                                                                                                                                                                                                                                                                                                                                                                                                                                                                                                                      |
| 33 | American Museum of Natural History, Bee specimen record database.<br><a href="https://www.discoverlife.org/mp/20l?id=AMNH_BEES108756">https://www.discoverlife.org/mp/20l?id=AMNH_BEES108756</a>                                                                                                                                                                                                                                                                                                                                                                                                                                                                                                                                                                                                                                                                                                                                                                                                                                                                                                                                                                                                                                                                                                                                                                                                                                                                                                                                                                                                                                                                                                                                                                                                                                                                                                                                                                                                                                                                                                                                                                                                                                                                                      |
| 34 | American Museum of Natural History, Bee specimen record database.<br><a href="https://www.discoverlife.org/mp/20l?id=AMNH_BEES108759">https://www.discoverlife.org/mp/20l?id=AMNH_BEES108759</a>                                                                                                                                                                                                                                                                                                                                                                                                                                                                                                                                                                                                                                                                                                                                                                                                                                                                                                                                                                                                                                                                                                                                                                                                                                                                                                                                                                                                                                                                                                                                                                                                                                                                                                                                                                                                                                                                                                                                                                                                                                                                                      |
| 35 | American Museum of Natural History, Bee specimen record database.<br><a href="https://www.discoverlife.org/mp/20l?id=AMNH_BEES108753">https://www.discoverlife.org/mp/20l?id=AMNH_BEES108753</a>                                                                                                                                                                                                                                                                                                                                                                                                                                                                                                                                                                                                                                                                                                                                                                                                                                                                                                                                                                                                                                                                                                                                                                                                                                                                                                                                                                                                                                                                                                                                                                                                                                                                                                                                                                                                                                                                                                                                                                                                                                                                                      |
| 36 | American Museum of Natural History, Bee specimen record database.<br><a href="https://www.discoverlife.org/mp/20l?id=AMNH_BEES108754">https://www.discoverlife.org/mp/20l?id=AMNH_BEES108754</a>                                                                                                                                                                                                                                                                                                                                                                                                                                                                                                                                                                                                                                                                                                                                                                                                                                                                                                                                                                                                                                                                                                                                                                                                                                                                                                                                                                                                                                                                                                                                                                                                                                                                                                                                                                                                                                                                                                                                                                                                                                                                                      |
| 37 | American Museum of Natural History, Bee specimen record database.<br><a href="https://www.discoverlife.org/mp/20l?id=AMNH_BEES108760">https://www.discoverlife.org/mp/20l?id=AMNH_BEES108760</a>                                                                                                                                                                                                                                                                                                                                                                                                                                                                                                                                                                                                                                                                                                                                                                                                                                                                                                                                                                                                                                                                                                                                                                                                                                                                                                                                                                                                                                                                                                                                                                                                                                                                                                                                                                                                                                                                                                                                                                                                                                                                                      |
| 38 | American Museum of Natural History, Bee specimen record database.<br><a href="https://www.discoverlife.org/mp/20l?id=AMNH_BEES108757">https://www.discoverlife.org/mp/20l?id=AMNH_BEES108757</a>                                                                                                                                                                                                                                                                                                                                                                                                                                                                                                                                                                                                                                                                                                                                                                                                                                                                                                                                                                                                                                                                                                                                                                                                                                                                                                                                                                                                                                                                                                                                                                                                                                                                                                                                                                                                                                                                                                                                                                                                                                                                                      |
| 39 | <i>Ceratina</i> American Museum of Natural History, Bee specimen record database.<br><a href="https://www.discoverlife.org/mp/20l?id=AMNH_BEE00031688">https://www.discoverlife.org/mp/20l?id=AMNH_BEE00031688</a>                                                                                                                                                                                                                                                                                                                                                                                                                                                                                                                                                                                                                                                                                                                                                                                                                                                                                                                                                                                                                                                                                                                                                                                                                                                                                                                                                                                                                                                                                                                                                                                                                                                                                                                                                                                                                                                                                                                                                                                                                                                                    |
| 40 | <i>smaragdula</i> American Museum of Natural History, Bee specimen record database.<br><a href="https://www.discoverlife.org/mp/20l?id=AMNH_BEES109701">https://www.discoverlife.org/mp/20l?id=AMNH_BEES109701</a><br>American Museum of Natural History, Bee specimen record database.<br><a href="https://www.discoverlife.org/mp/20l?id=AMNH_BEE00031686">https://www.discoverlife.org/mp/20l?id=AMNH_BEE00031686</a><br>USDA-ARS Bee Biology and Systematics Laboratory: Bee Biology<br>and Systematics Laboratory<br><a href="https://www.discoverlife.org/mp/20l?id=BBSL347461">https://www.discoverlife.org/mp/20l?id=BBSL347461</a><br>USDA-ARS Bee Biology and Systematics Laboratory: Bee Biology<br>and Systematics Laboratory<br><a href="https://www.discoverlife.org/mp/20l?id=BBSL347612">https://www.discoverlife.org/mp/20l?id=BBSL347612</a><br>American Museum of Natural History, Bee specimen record database<br><a href="https://www.discoverlife.org/mp/20l?id=AMNH_BEES109704">https://www.discoverlife.org/mp/20l?id=AMNH_BEES109704</a><br>American Museum of Natural History, Bee specimen record database<br><a href="https://www.discoverlife.org/mp/20l?id=AMNH_BEES109770">https://www.discoverlife.org/mp/20l?id=AMNH_BEES109770</a><br>American Museum of Natural History, Bee specimen record database<br><a href="https://www.discoverlife.org/mp/20l?id=AMNH_BEES109769">https://www.discoverlife.org/mp/20l?id=AMNH_BEES109769</a><br>American Museum of Natural History, Bee specimen record database<br><a href="https://www.discoverlife.org/mp/20l?id=AMNH_BEES109772">https://www.discoverlife.org/mp/20l?id=AMNH_BEES109772</a><br>American Museum of Natural History, Bee specimen record database<br><a href="https://www.discoverlife.org/mp/20l?id=AMNH_BEES109765">https://www.discoverlife.org/mp/20l?id=AMNH_BEES109765</a><br>American Museum of Natural History, Bee specimen record database<br><a href="https://www.discoverlife.org/mp/20l?id=AMNH_BEE00031722">https://www.discoverlife.org/mp/20l?id=AMNH_BEE00031722</a><br>American Museum of Natural History, Bee specimen record database<br><a href="https://www.discoverlife.org/mp/20l?id=AMNH_BEES109764">https://www.discoverlife.org/mp/20l?id=AMNH_BEES109764</a> |

American Museum of Natural History, Bee specimen record database  
iNaturalist.org: iNaturalist research-grade observations  
<https://www.discoverlife.org/mp/20l?id=INAT13825260>  
iNaturalist.org: iNaturalist research-grade observations  
<https://www.discoverlife.org/mp/20l?id=INAT8483618>  
American Museum of Natural History, Bee specimen record database  
[https://www.discoverlife.org/mp/20l?id=AMNH\\_BEES109767](https://www.discoverlife.org/mp/20l?id=AMNH_BEES109767)  
iNaturalist.org: iNaturalist research-grade observations  
<https://www.discoverlife.org/mp/20l?id=INAT13865626>  
American Museum of Natural History, Bee specimen record database  
[https://www.discoverlife.org/mp/20l?id=AMNH\\_BEES109771](https://www.discoverlife.org/mp/20l?id=AMNH_BEES109771)  
American Museum of Natural History, Bee specimen record database  
[https://www.discoverlife.org/mp/20l?id=AMNH\\_BEES109729](https://www.discoverlife.org/mp/20l?id=AMNH_BEES109729)  
American Museum of Natural History, Bee specimen record database  
[https://www.discoverlife.org/mp/20l?id=AMNH\\_BEES109728](https://www.discoverlife.org/mp/20l?id=AMNH_BEES109728)  
American Museum of Natural History, Bee specimen record database  
[https://www.discoverlife.org/mp/20l?id=AMNH\\_BEES109722](https://www.discoverlife.org/mp/20l?id=AMNH_BEES109722)  
American Museum of Natural History, Bee specimen record database  
[https://www.discoverlife.org/mp/20l?id=AMNH\\_BEES109763](https://www.discoverlife.org/mp/20l?id=AMNH_BEES109763)  
American Museum of Natural History, Bee specimen record database  
[https://www.discoverlife.org/mp/20l?id=AMNH\\_BEES109720](https://www.discoverlife.org/mp/20l?id=AMNH_BEES109720)  
York University  
[https://www.discoverlife.org/mp/20l?id=BOLD\\_BOWGF359\\_09](https://www.discoverlife.org/mp/20l?id=BOLD_BOWGF359_09)  
American Museum of Natural History, Bee specimen record database  
[https://www.discoverlife.org/mp/20l?id=AMNH\\_BEES109726](https://www.discoverlife.org/mp/20l?id=AMNH_BEES109726)  
American Museum of Natural History, Bee specimen record database  
[https://www.discoverlife.org/mp/20l?id=AMNH\\_BEES109761](https://www.discoverlife.org/mp/20l?id=AMNH_BEES109761)  
American Museum of Natural History, Bee specimen record database  
[https://www.discoverlife.org/mp/20l?id=AMNH\\_BEES109760](https://www.discoverlife.org/mp/20l?id=AMNH_BEES109760)  
American Museum of Natural History, Bee specimen record database  
[https://www.discoverlife.org/mp/20l?id=AMNH\\_BEES109752](https://www.discoverlife.org/mp/20l?id=AMNH_BEES109752)  
American Museum of Natural History, Bee specimen record database  
[https://www.discoverlife.org/mp/20l?id=AMNH\\_BEES109746](https://www.discoverlife.org/mp/20l?id=AMNH_BEES109746)  
American Museum of Natural History, Bee specimen record database  
[https://www.discoverlife.org/mp/20l?id=AMNH\\_BEES109738](https://www.discoverlife.org/mp/20l?id=AMNH_BEES109738)  
American Museum of Natural History, Bee specimen record database  
iNaturalist.org: iNaturalist research-grade observations  
<https://www.discoverlife.org/mp/20l?id=INAT32327326>  
American Museum of Natural History, Bee specimen record database  
[https://www.discoverlife.org/mp/20l?id=AMNH\\_BEES109750](https://www.discoverlife.org/mp/20l?id=AMNH_BEES109750)  
American Museum of Natural History, Bee specimen record database  
[https://www.discoverlife.org/mp/20l?id=AMNH\\_BEES109751](https://www.discoverlife.org/mp/20l?id=AMNH_BEES109751)  
American Museum of Natural History, Bee specimen record database  
[https://www.discoverlife.org/mp/20l?id=AMNH\\_BEES109709](https://www.discoverlife.org/mp/20l?id=AMNH_BEES109709)  
American Museum of Natural History, Bee specimen record database  
[https://www.discoverlife.org/mp/20l?id=AMNH\\_BEES109710](https://www.discoverlife.org/mp/20l?id=AMNH_BEES109710)

American Museum of Natural History, Bee specimen record database  
[https://www.discoverlife.org/mp/20l?id=AMNH\\_BEES109711](https://www.discoverlife.org/mp/20l?id=AMNH_BEES109711)  
American Museum of Natural History, Bee specimen record database  
[https://www.discoverlife.org/mp/20l?id=AMNH\\_BEES109793](https://www.discoverlife.org/mp/20l?id=AMNH_BEES109793)  
iNaturalist.org: iNaturalist research-grade observations  
<https://www.discoverlife.org/mp/20l?id=INAT9751564>  
American Museum of Natural History, Bee specimen record database  
[https://www.discoverlife.org/mp/20l?id=AMNH\\_BEES109790](https://www.discoverlife.org/mp/20l?id=AMNH_BEES109790)  
American Museum of Natural History, Bee specimen record database  
[https://www.discoverlife.org/mp/20l?id=AMNH\\_BEES109716](https://www.discoverlife.org/mp/20l?id=AMNH_BEES109716)  
American Museum of Natural History, Bee specimen record database  
[https://www.discoverlife.org/mp/20l?id=AMNH\\_BEES109714](https://www.discoverlife.org/mp/20l?id=AMNH_BEES109714)  
American Museum of Natural History, Bee specimen record database  
[https://www.discoverlife.org/mp/20l?id=AMNH\\_BEES109707](https://www.discoverlife.org/mp/20l?id=AMNH_BEES109707)  
American Museum of Natural History, Bee specimen record database  
[https://www.discoverlife.org/mp/20l?id=AMNH\\_BEES109706](https://www.discoverlife.org/mp/20l?id=AMNH_BEES109706)

---

*Lasioglossum*  
*impavidum*

USDA-ARS Bee Biology and Systematics Laboratory: Bee Biology and Systematics Laboratory  
<https://www.discoverlife.org/mp/20l?id=BBSL435935>  
USDA-ARS Bee Biology and Systematics Laboratory: Bee Biology and Systematics Laboratory  
<https://www.discoverlife.org/mp/20l?id=BBSL454632>  
USDA-ARS Bee Biology and Systematics Laboratory: Bee Biology and Systematics Laboratory  
<https://www.discoverlife.org/mp/20l?id=BBSL350436>  
USDA-ARS Bee Biology and Systematics Laboratory: Bee Biology and Systematics Laboratory  
<https://www.discoverlife.org/mp/20l?id=BBSL510282>  
USDA-ARS Bee Biology and Systematics Laboratory: Bee Biology and Systematics Laboratory  
<https://www.discoverlife.org/mp/20l?id=BBSL451103>  
USDA-ARS Bee Biology and Systematics Laboratory: Bee Biology and Systematics Laboratory  
<https://www.discoverlife.org/mp/20l?id=BBSL456477>  
USDA-ARS Bee Biology and Systematics Laboratory: Bee Biology and Systematics Laboratory  
[https://www.discoverlife.org/mp/20l?id=BBSL\\_ZION31023](https://www.discoverlife.org/mp/20l?id=BBSL_ZION31023)  
USDA-ARS Bee Biology and Systematics Laboratory: Bee Biology and Systematics Laboratory  
<https://www.discoverlife.org/mp/20l?id=BBSL509896>  
USDA-ARS Bee Biology and Systematics Laboratory: Bee Biology and Systematics Laboratory  
<https://www.discoverlife.org/mp/20l?id=BBSL321662>  
USDA-ARS Bee Biology and Systematics Laboratory: Bee Biology and Systematics Laboratory  
<https://www.discoverlife.org/mp/20l?id=BBSL509899>



USDA-ARS Bee Biology and Systematics Laboratory: Bee Biology and Systematics Laboratory

<https://www.discoverlife.org/mp/20l?id=BBSL509906>

USDA-ARS Bee Biology and Systematics Laboratory: Bee Biology and Systematics Laboratory

<https://www.discoverlife.org/mp/20l?id=BBSL262958>

USDA-ARS Bee Biology and Systematics Laboratory: Bee Biology and Systematics Laboratory

<https://www.discoverlife.org/mp/20l?id=BBSL301324>

USDA-ARS Bee Biology and Systematics Laboratory: Bee Biology and Systematics Laboratory

<https://www.discoverlife.org/mp/20l?id=BBSL300071>

USDA-ARS Bee Biology and Systematics Laboratory: Bee Biology and Systematics Laboratory

<https://www.discoverlife.org/mp/20l?id=BBSL509903>

USDA-ARS Bee Biology and Systematics Laboratory: Bee Biology and Systematics Laboratory

<https://www.discoverlife.org/mp/20l?id=BBSL279758>

USDA-ARS Bee Biology and Systematics Laboratory: Bee Biology and Systematics Laboratory

<https://www.discoverlife.org/mp/20l?id=BBSL93812>

USDA-ARS Bee Biology and Systematics Laboratory: Bee Biology and Systematics Laboratory

<https://www.discoverlife.org/mp/20l?id=BBSL313284>

---

*Lasioglossum  
microlepoides*

USGS. Sam Droege

[https://www.discoverlife.org/mp/20l?id=USGS\\_DRO292436](https://www.discoverlife.org/mp/20l?id=USGS_DRO292436)

USGS. Sam Droege

[https://www.discoverlife.org/mp/20l?id=USGS\\_DRO404813](https://www.discoverlife.org/mp/20l?id=USGS_DRO404813)

USDA-ARS Bee Biology and Systematics Laboratory: Bee Biology and Systematics Laboratory

<https://www.discoverlife.org/mp/20l?id=BBSL583997>

USDA-ARS Bee Biology and Systematics Laboratory: Bee Biology and Systematics Laboratory

<https://www.discoverlife.org/mp/20l?id=BBSL583997>

USDA-ARS Bee Biology and Systematics Laboratory: Bee Biology and Systematics Laboratory

<https://www.discoverlife.org/mp/20l?id=BBSL339028>

USDA-ARS Bee Biology and Systematics Laboratory: Bee Biology and Systematics Laboratory

<https://www.discoverlife.org/mp/20l?id=BBSL297760>

USDA-ARS Bee Biology and Systematics Laboratory: Bee Biology and Systematics Laboratory

<https://www.discoverlife.org/mp/20l?id=BBSL94268>

USDA-ARS Bee Biology and Systematics Laboratory: Bee Biology and Systematics Laboratory

<https://www.discoverlife.org/mp/20l?id=BBSL93867>

iNaturalist.org: iNaturalist research-grade observations  
<https://www.discoverlife.org/mp/20l?id=INAT2769134>  
iNaturalist.org: iNaturalist research-grade observations  
<https://www.discoverlife.org/mp/20l?id=INAT3459005>  
University of California Riverside Entomology Museum database  
<https://www.discoverlife.org/mp/20l?id=UCREM510>  
USDA-ARS Bee Biology and Systematics Laboratory: Bee Biology and Systematics Laboratory  
<https://www.discoverlife.org/mp/20l?id=BBSL323275>  
USDA-ARS Bee Biology and Systematics Laboratory: Bee Biology and Systematics Laboratory  
<https://www.discoverlife.org/mp/20l?id=BBSL322921>  
USDA-ARS Bee Biology and Systematics Laboratory: Bee Biology and Systematics Laboratory  
<https://www.discoverlife.org/mp/20l?id=BBSL281346>  
USDA-ARS Bee Biology and Systematics Laboratory: Bee Biology and Systematics Laboratory  
<https://www.discoverlife.org/mp/20l?id=BBSL509975>  
USDA-ARS Bee Biology and Systematics Laboratory: Bee Biology and Systematics Laboratory  
<https://www.discoverlife.org/mp/20l?id=BBSL93917>  
USDA-ARS Bee Biology and Systematics Laboratory: Bee Biology and Systematics Laboratory  
<https://www.discoverlife.org/mp/20l?id=BBSL278593>  
USDA-ARS Bee Biology and Systematics Laboratory: Bee Biology and Systematics Laboratory  
<https://www.discoverlife.org/mp/20l?id=BBSL509972>  
USDA-ARS Bee Biology and Systematics Laboratory: Bee Biology and Systematics Laboratory  
<https://www.discoverlife.org/mp/20l?id=BBSL262697>  
USDA-ARS Bee Biology and Systematics Laboratory: Bee Biology and Systematics Laboratory  
<https://www.discoverlife.org/mp/20l?id=BBSL299424>  
USDA-ARS Bee Biology and Systematics Laboratory: Bee Biology and Systematics Laboratory  
<https://www.discoverlife.org/mp/20l?id=BBSL319435>  
USDA-ARS Bee Biology and Systematics Laboratory: Bee Biology and Systematics Laboratory  
<https://www.discoverlife.org/mp/20l?id=BBSL319366>  
York University. BOLD database.  
[https://www.discoverlife.org/mp/20l?id=BOLD\\_DLII1000\\_07](https://www.discoverlife.org/mp/20l?id=BOLD_DLII1000_07)  
USGS. Sam Droege  
[https://www.discoverlife.org/mp/20l?id=USGS\\_DRO332280](https://www.discoverlife.org/mp/20l?id=USGS_DRO332280)  
American Museum of Natural History. Bee Specimen Record database.  
[https://www.discoverlife.org/mp/20l?id=AMNH\\_BEE00119936](https://www.discoverlife.org/mp/20l?id=AMNH_BEE00119936)

American Museum of Natural History. Bee Specimen Record database.

[https://www.discoverlife.org/mp/20l?id=AMNH\\_BEE00119939](https://www.discoverlife.org/mp/20l?id=AMNH_BEE00119939)

USDA-ARS Bee Biology and Systematics Laboratory: Bee Biology and Systematics Laboratory

<https://www.discoverlife.org/mp/20l?id=BBSL321175>

USDA-ARS Bee Biology and Systematics Laboratory: Bee Biology and Systematics Laboratory

<https://www.discoverlife.org/mp/20l?id=BBSL321006>

USDA-ARS Bee Biology and Systematics Laboratory: Bee Biology and Systematics Laboratory

<https://www.discoverlife.org/mp/20l?id=BBSL324994>

USDA-ARS Bee Biology and Systematics Laboratory: Bee Biology and Systematics Laboratory

<https://www.discoverlife.org/mp/20l?id=BBSL135422>

USDA-ARS Bee Biology and Systematics Laboratory: Bee Biology and Systematics Laboratory

[https://www.discoverlife.org/mp/20l?id=BBSL\\_ZION32709](https://www.discoverlife.org/mp/20l?id=BBSL_ZION32709)

USDA-ARS Bee Biology and Systematics Laboratory: Bee Biology and Systematics Laboratory

<https://www.discoverlife.org/mp/20l?id=BBSL375168>

USDA-ARS Bee Biology and Systematics Laboratory: Bee Biology and Systematics Laboratory

<https://www.discoverlife.org/mp/20l?id=BBSL492017>

USDA-ARS Bee Biology and Systematics Laboratory: Bee Biology and Systematics Laboratory

<https://www.discoverlife.org/mp/20l?id=BBSL33972>

USGS. Sam Droege

[https://www.discoverlife.org/mp/20l?id=USGS\\_DRO219945](https://www.discoverlife.org/mp/20l?id=USGS_DRO219945)

USGS. Sam Droege

[https://www.discoverlife.org/mp/20l?id=USGS\\_DRO217300](https://www.discoverlife.org/mp/20l?id=USGS_DRO217300)

USGS. Sam Droege

[https://www.discoverlife.org/mp/20l?id=USGS\\_DRO175083](https://www.discoverlife.org/mp/20l?id=USGS_DRO175083)

USDA-ARS Bee Biology and Systematics Laboratory: Bee Biology and Systematics Laboratory

<https://www.discoverlife.org/mp/20l?id=BBSL33971>

USDA-ARS Bee Biology and Systematics Laboratory: Bee Biology and Systematics Laboratory

<https://www.discoverlife.org/mp/20l?id=BBSL664493>

USDA-ARS Bee Biology and Systematics Laboratory: Bee Biology and Systematics Laboratory

<https://www.discoverlife.org/mp/20l?id=BBSL109934>

USDA-ARS Bee Biology and Systematics Laboratory: Bee Biology and Systematics Laboratory

<https://www.discoverlife.org/mp/20l?id=BBSL750705>



American Museum of Natural History. Bee Specimen Record database.  
[https://www.discoverlife.org/mp/20l?id=AMNH\\_BEE00119940](https://www.discoverlife.org/mp/20l?id=AMNH_BEE00119940)  
 American Museum of Natural History. Bee Specimen Record database.  
[https://www.discoverlife.org/mp/20l?id=AMNH\\_BEE00208178](https://www.discoverlife.org/mp/20l?id=AMNH_BEE00208178)  
 USDA-ARS Bee Biology and Systematics Laboratory: Bee Biology and Systematics Laboratory  
<https://www.discoverlife.org/mp/20l?id=BBSL109928>  
 USGS. Sam Droege  
[https://www.discoverlife.org/mp/20l?id=USGS\\_DRO225830](https://www.discoverlife.org/mp/20l?id=USGS_DRO225830)  
 USDA-ARS Bee Biology and Systematics Laboratory: Bee Biology and Systematics Laboratory  
<https://www.discoverlife.org/mp/20l?id=BBSL750569>  
 Kansas Natural History Museum Snow Entomology Collection database. <https://www.discoverlife.org/mp/20l?id=KSEM313640>  
 Kansas Natural History Museum Snow Entomology Collection database. <https://www.discoverlife.org/mp/20l?id=KSEM313645>

---

*Lasioglossum  
puteulanum*

USGS. Sam Droege  
[https://www.discoverlife.org/mp/20l?id=USGS\\_DRO141676](https://www.discoverlife.org/mp/20l?id=USGS_DRO141676)  
 USGS. Sam Droege  
[https://www.discoverlife.org/mp/20l?id=USGS\\_DRO266346](https://www.discoverlife.org/mp/20l?id=USGS_DRO266346)  
 USGS. Sam Droege  
[https://www.discoverlife.org/mp/20l?id=USGS\\_DRO208732](https://www.discoverlife.org/mp/20l?id=USGS_DRO208732)  
 USGS. Sam Droege  
[https://www.discoverlife.org/mp/20l?id=USGS\\_DRO228014](https://www.discoverlife.org/mp/20l?id=USGS_DRO228014)  
 USGS. Sam Droege  
[https://www.discoverlife.org/mp/20l?id=USGS\\_DRO614555](https://www.discoverlife.org/mp/20l?id=USGS_DRO614555)  
 USGS. Sam Droege  
[https://www.discoverlife.org/mp/20l?id=USGS\\_DRO185679](https://www.discoverlife.org/mp/20l?id=USGS_DRO185679)  
 USGS. Sam Droege  
[https://www.discoverlife.org/mp/20l?id=USGS\\_DRO208355](https://www.discoverlife.org/mp/20l?id=USGS_DRO208355)  
 USGS. Sam Droege  
[https://www.discoverlife.org/mp/20l?id=USGS\\_DRO208653](https://www.discoverlife.org/mp/20l?id=USGS_DRO208653)  
 USGS. Sam Droege  
[https://www.discoverlife.org/mp/20l?id=USGS\\_DRO211657](https://www.discoverlife.org/mp/20l?id=USGS_DRO211657)  
 USGS. Sam Droege  
[https://www.discoverlife.org/mp/20l?id=USGS\\_DRO208511](https://www.discoverlife.org/mp/20l?id=USGS_DRO208511)  
 USGS. Sam Droege  
[https://www.discoverlife.org/mp/20l?id=USGS\\_DRO218272](https://www.discoverlife.org/mp/20l?id=USGS_DRO218272)  
 York University Bold database.  
[https://www.discoverlife.org/mp/20l?id=BOLD\\_DIAL487\\_06](https://www.discoverlife.org/mp/20l?id=BOLD_DIAL487_06)  
 USGS. Sam Droege  
[https://www.discoverlife.org/mp/20l?id=USGS\\_DRO119394](https://www.discoverlife.org/mp/20l?id=USGS_DRO119394)  
 USGS. Sam Droege  
[https://www.discoverlife.org/mp/20l?id=USGS\\_DRO125971](https://www.discoverlife.org/mp/20l?id=USGS_DRO125971)

USGS. Sam Droege  
[https://www.discoverlife.org/mp/20l?id=USGS\\_DRO124162](https://www.discoverlife.org/mp/20l?id=USGS_DRO124162)  
USGS. Sam Droege  
[https://www.discoverlife.org/mp/20l?id=USGS\\_DRO125682](https://www.discoverlife.org/mp/20l?id=USGS_DRO125682)  
USGS. Sam Droege  
[https://www.discoverlife.org/mp/20l?id=USGS\\_DRO125583](https://www.discoverlife.org/mp/20l?id=USGS_DRO125583)  
USGS. Sam Droege  
[https://www.discoverlife.org/mp/20l?id=USGS\\_DRO125913](https://www.discoverlife.org/mp/20l?id=USGS_DRO125913)  
USGS. Sam Droege  
[https://www.discoverlife.org/mp/20l?id=USGS\\_DRO119426](https://www.discoverlife.org/mp/20l?id=USGS_DRO119426)  
USGS. Sam Droege  
[https://www.discoverlife.org/mp/20l?id=USGS\\_DRO228014](https://www.discoverlife.org/mp/20l?id=USGS_DRO228014)  
USGS. Sam Droege  
[https://www.discoverlife.org/mp/20l?id=USGS\\_DRO614555](https://www.discoverlife.org/mp/20l?id=USGS_DRO614555)  
York University Bold database  
[https://www.discoverlife.org/mp/20l?id=BOLD\\_DLII465\\_07](https://www.discoverlife.org/mp/20l?id=BOLD_DLII465_07)  
York University Bold database  
[https://www.discoverlife.org/mp/20l?id=BOLD\\_DIAL498\\_06](https://www.discoverlife.org/mp/20l?id=BOLD_DIAL498_06)  
USGS. Sam Droege  
[https://www.discoverlife.org/mp/20l?id=USGS\\_DRO185679](https://www.discoverlife.org/mp/20l?id=USGS_DRO185679)  
USGS. Sam Droege  
[https://www.discoverlife.org/mp/20l?id=USGS\\_DRO485447](https://www.discoverlife.org/mp/20l?id=USGS_DRO485447)  
USGS. Sam Droege  
[https://www.discoverlife.org/mp/20l?id=USGS\\_DRO419180](https://www.discoverlife.org/mp/20l?id=USGS_DRO419180)  
USGS. Sam Droege  
[https://www.discoverlife.org/mp/20l?id=USGS\\_DRO322750](https://www.discoverlife.org/mp/20l?id=USGS_DRO322750)  
USGS. Sam Droege  
[https://www.discoverlife.org/mp/20l?id=USGS\\_DRO322627](https://www.discoverlife.org/mp/20l?id=USGS_DRO322627)  
USGS. Sam Droege  
[https://www.discoverlife.org/mp/20l?id=USGS\\_DRO322772](https://www.discoverlife.org/mp/20l?id=USGS_DRO322772)  
USGS. Sam Droege  
[https://www.discoverlife.org/mp/20l?id=USGS\\_DRO456140](https://www.discoverlife.org/mp/20l?id=USGS_DRO456140)  
USGS. Sam Droege  
[https://www.discoverlife.org/mp/20l?id=USGS\\_DRO032314](https://www.discoverlife.org/mp/20l?id=USGS_DRO032314)  
York University BOLD database.  
[https://www.discoverlife.org/mp/20l?id=BOLD\\_DIAL029\\_06](https://www.discoverlife.org/mp/20l?id=BOLD_DIAL029_06)  
York University BOLD database.  
[https://www.discoverlife.org/mp/20l?id=BOLD\\_DLII472\\_07](https://www.discoverlife.org/mp/20l?id=BOLD_DLII472_07)  
York University BOLD database  
[https://www.discoverlife.org/mp/20l?id=BOLD\\_DIAL514\\_06](https://www.discoverlife.org/mp/20l?id=BOLD_DIAL514_06)  
York University BOLD database  
[https://www.discoverlife.org/mp/20l?id=BOLD\\_DIAL514\\_06](https://www.discoverlife.org/mp/20l?id=BOLD_DIAL514_06)  
American Museum of Natural History, Bee Specimen Record  
database  
[https://www.discoverlife.org/mp/20l?id=AMNH\\_BEE00210751](https://www.discoverlife.org/mp/20l?id=AMNH_BEE00210751)

American Museum of Natural History, Bee Specimen Record database  
[https://www.discoverlife.org/mp/20l?id=AMNH\\_BEE00116083](https://www.discoverlife.org/mp/20l?id=AMNH_BEE00116083)  
 USGS. Sam Droege  
[https://www.discoverlife.org/mp/20l?id=USGS\\_DRO093456](https://www.discoverlife.org/mp/20l?id=USGS_DRO093456)  
 USGS. Sam Droege  
[https://www.discoverlife.org/mp/20l?id=USGS\\_DRO456115](https://www.discoverlife.org/mp/20l?id=USGS_DRO456115)  
 USGS. Sam Droege  
[https://www.discoverlife.org/mp/20l?id=USGS\\_DRO344954](https://www.discoverlife.org/mp/20l?id=USGS_DRO344954)  
 USGS. Sam Droege  
[https://www.discoverlife.org/mp/20l?id=USGS\\_DRO121910](https://www.discoverlife.org/mp/20l?id=USGS_DRO121910)  
 American Museum of Natural History, Bee Specimen Record database  
[https://www.discoverlife.org/mp/20l?id=AMNH\\_BEE00262005](https://www.discoverlife.org/mp/20l?id=AMNH_BEE00262005)  
 American Museum of Natural History, Bee Specimen Record database  
[https://www.discoverlife.org/mp/20l?id=AMNH\\_BEE00076617](https://www.discoverlife.org/mp/20l?id=AMNH_BEE00076617)  
 American Museum of Natural History, Bee Specimen Record database  
[https://www.discoverlife.org/mp/20l?id=AMNH\\_BEE00076614](https://www.discoverlife.org/mp/20l?id=AMNH_BEE00076614)

---

*Megachile  
umbripennis*

American Museum of Natural History, Bee Specimen Record database  
[https://www.discoverlife.org/mp/20l?id=AMNH\\_BEE00251347](https://www.discoverlife.org/mp/20l?id=AMNH_BEE00251347)  
 USGS. Sam Droege  
[https://www.discoverlife.org/mp/20l?id=USGS\\_DRO375353](https://www.discoverlife.org/mp/20l?id=USGS_DRO375353)  
 American Museum of Natural History, Bee Specimen Record database  
[https://www.discoverlife.org/mp/20l?id=AMNH\\_BEES105501](https://www.discoverlife.org/mp/20l?id=AMNH_BEES105501)  
 American Museum of Natural History, Bee Specimen Record database  
[https://www.discoverlife.org/mp/20l?id=AMNH\\_BEES105502](https://www.discoverlife.org/mp/20l?id=AMNH_BEES105502)  
 American Museum of Natural History, Bee Specimen Record database  
[https://www.discoverlife.org/mp/20l?id=AMNH\\_BEES105503](https://www.discoverlife.org/mp/20l?id=AMNH_BEES105503)  
 American Museum of Natural History, Bee Specimen Record database  
[https://www.discoverlife.org/mp/20l?id=AMNH\\_BEES105504](https://www.discoverlife.org/mp/20l?id=AMNH_BEES105504)  
 American Museum of Natural History, Bee Specimen Record database  
[https://www.discoverlife.org/mp/20l?id=AMNH\\_BEES105527](https://www.discoverlife.org/mp/20l?id=AMNH_BEES105527)  
 American Museum of Natural History, Bee Specimen Record database  
[https://www.discoverlife.org/mp/20l?id=AMNH\\_BEES105538](https://www.discoverlife.org/mp/20l?id=AMNH_BEES105538)  
 American Museum of Natural History, Bee Specimen Record database  
[https://www.discoverlife.org/mp/20l?id=AMNH\\_BEES105537](https://www.discoverlife.org/mp/20l?id=AMNH_BEES105537)

American Museum of Natural History, Bee Specimen Record database  
[https://www.discoverlife.org/mp/20l?id=AMNH\\_BEES105525](https://www.discoverlife.org/mp/20l?id=AMNH_BEES105525)  
American Museum of Natural History, Bee Specimen Record database  
[https://www.discoverlife.org/mp/20l?id=AMNH\\_BEES105535](https://www.discoverlife.org/mp/20l?id=AMNH_BEES105535)  
American Museum of Natural History, Bee Specimen Record database  
[https://www.discoverlife.org/mp/20l?id=AMNH\\_BEES105529](https://www.discoverlife.org/mp/20l?id=AMNH_BEES105529)  
American Museum of Natural History, Bee Specimen Record database  
[https://www.discoverlife.org/mp/20l?id=AMNH\\_BEES105533](https://www.discoverlife.org/mp/20l?id=AMNH_BEES105533)  
American Museum of Natural History, Bee Specimen Record database  
[https://www.discoverlife.org/mp/20l?id=AMNH\\_BEES105536](https://www.discoverlife.org/mp/20l?id=AMNH_BEES105536)  
American Museum of Natural History, Bee Specimen Record database  
[https://www.discoverlife.org/mp/20l?id=AMNH\\_BEES105532](https://www.discoverlife.org/mp/20l?id=AMNH_BEES105532)  
American Museum of Natural History, Bee Specimen Record database  
[https://www.discoverlife.org/mp/20l?id=AMNH\\_BEES105532](https://www.discoverlife.org/mp/20l?id=AMNH_BEES105532)  
USDA-ARS Bee Biology and Systematics Laboratory: Bee Biology and Systematics Laboratory  
<https://www.discoverlife.org/mp/20l?id=BBSL746023>  
iNaturalist.org: iNaturalist research-grade observations  
<https://www.discoverlife.org/mp/20l?id=INAT34159126>  
iNaturalist.org: iNaturalist research-grade observations  
<https://www.discoverlife.org/mp/20l?id=INAT34622353>  
iNaturalist.org: iNaturalist research-grade observations  
<https://www.discoverlife.org/mp/20l?id=INAT12373299>  
iNaturalist.org: iNaturalist research-grade observations  
<https://www.discoverlife.org/mp/20l?id=INAT16860468>  
iNaturalist.org: iNaturalist research-grade observations  
<https://www.discoverlife.org/mp/20l?id=INAT19688947>  
American Museum of Natural History, Bee Specimen Record database  
[https://www.discoverlife.org/mp/20l?id=AMNH\\_BEES105526](https://www.discoverlife.org/mp/20l?id=AMNH_BEES105526)  
American Museum of Natural History, Bee Specimen Record database  
[https://www.discoverlife.org/mp/20l?id=AMNH\\_BEES105531](https://www.discoverlife.org/mp/20l?id=AMNH_BEES105531)  
American Museum of Natural History, Bee Specimen Record database  
[https://www.discoverlife.org/mp/20l?id=AMNH\\_BEES105511](https://www.discoverlife.org/mp/20l?id=AMNH_BEES105511)  
American Museum of Natural History, Bee Specimen Record database  
[https://www.discoverlife.org/mp/20l?id=AMNH\\_BEES105509](https://www.discoverlife.org/mp/20l?id=AMNH_BEES105509)

American Museum of Natural History, Bee Specimen Record database  
[https://www.discoverlife.org/mp/20l?id=AMNH\\_BEES105510](https://www.discoverlife.org/mp/20l?id=AMNH_BEES105510)  
 American Museum of Natural History, Bee Specimen Record database  
[https://www.discoverlife.org/mp/20l?id=AMNH\\_BEES105508](https://www.discoverlife.org/mp/20l?id=AMNH_BEES105508)  
 American Museum of Natural History, Bee Specimen Record database  
[https://www.discoverlife.org/mp/20l?id=AMNH\\_BEES105521](https://www.discoverlife.org/mp/20l?id=AMNH_BEES105521)  
 American Museum of Natural History, Bee Specimen Record database  
[https://www.discoverlife.org/mp/20l?id=AMNH\\_BEES105514](https://www.discoverlife.org/mp/20l?id=AMNH_BEES105514)  
 American Museum of Natural History, Bee Specimen Record database  
[https://www.discoverlife.org/mp/20l?id=AMNH\\_BEES105522](https://www.discoverlife.org/mp/20l?id=AMNH_BEES105522)  
 American Museum of Natural History, Bee Specimen Record database  
[https://www.discoverlife.org/mp/20l?id=AMNH\\_BEES105513](https://www.discoverlife.org/mp/20l?id=AMNH_BEES105513)  
 American Museum of Natural History, Bee Specimen Record database  
[https://www.discoverlife.org/mp/20l?id=AMNH\\_BEE00010198](https://www.discoverlife.org/mp/20l?id=AMNH_BEE00010198)  
 American Museum of Natural History, Bee Specimen Record database  
[https://www.discoverlife.org/mp/20l?id=AMNH\\_BEE00010199](https://www.discoverlife.org/mp/20l?id=AMNH_BEE00010199)  
 iNaturalist.org: iNaturalist research-grade observations  
<https://www.discoverlife.org/mp/20l?id=INAT12476358>  
 USDA-ARS Bee Biology and Systematics Laboratory: Bee Biology and Systematics Laboratory  
<https://www.discoverlife.org/mp/20l?id=BBSL743787>

|                          |                                                                                                                                                                                                    |
|--------------------------|----------------------------------------------------------------------------------------------------------------------------------------------------------------------------------------------------|
| <i>Xylocopa sonorina</i> | iNaturalist.org: iNaturalist research-grade observations<br><a href="https://www.discoverlife.org/mp/20l?id=INAT29692584">https://www.discoverlife.org/mp/20l?id=INAT29692584</a>                  |
|                          | University of California, Riverside, Entomology Research Museum database <a href="https://www.discoverlife.org/mp/20l?id=UCRC_ENT60071">https://www.discoverlife.org/mp/20l?id=UCRC_ENT60071</a>   |
|                          | American Museum of Natural History, Bee Specimen Record database<br><a href="https://www.discoverlife.org/mp/20l?id=AMNH_BEES23931">https://www.discoverlife.org/mp/20l?id=AMNH_BEES23931</a>      |
|                          | University of California, Riverside, Entomology Research Museum database <a href="https://www.discoverlife.org/mp/20l?id=UCRC_ENT144059">https://www.discoverlife.org/mp/20l?id=UCRC_ENT144059</a> |
|                          | University of California, Riverside, Entomology Research Museum database <a href="https://www.discoverlife.org/mp/20l?id=UCRC_ENT42827">https://www.discoverlife.org/mp/20l?id=UCRC_ENT42827</a>   |
|                          | University of California, Riverside, Entomology Research Museum database <a href="https://www.discoverlife.org/mp/20l?id=UCRC_ENT331342">https://www.discoverlife.org/mp/20l?id=UCRC_ENT331342</a> |
|                          |                                                                                                                                                                                                    |
|                          |                                                                                                                                                                                                    |

**(b) Non-native (Hawai‘i) records.**

| ID | Species | Institution |
|----|---------|-------------|
|----|---------|-------------|



|    |                            |                                                                                                                                                                                                                                                                                                                                                                                                                                                                                                                                                                                                                                                                        |
|----|----------------------------|------------------------------------------------------------------------------------------------------------------------------------------------------------------------------------------------------------------------------------------------------------------------------------------------------------------------------------------------------------------------------------------------------------------------------------------------------------------------------------------------------------------------------------------------------------------------------------------------------------------------------------------------------------------------|
| 1  | <i>Ceratina dentipes</i>   | iNaturalist.org: iNaturalist research-grade observations<br><a href="https://www.discoverlife.org/mp/20l?id=INAT4449583">https://www.discoverlife.org/mp/20l?id=INAT4449583</a>                                                                                                                                                                                                                                                                                                                                                                                                                                                                                        |
| 2  | <i>Ceratina smaragdula</i> | iNaturalist.org: iNaturalist research-grade observations<br><a href="https://www.discoverlife.org/mp/20l?id=INAT17525366">https://www.discoverlife.org/mp/20l?id=INAT17525366</a>                                                                                                                                                                                                                                                                                                                                                                                                                                                                                      |
| 3  |                            | USGS. Sam Droege<br><a href="https://www.discoverlife.org/mp/20l?id=USGS_DRO395295">https://www.discoverlife.org/mp/20l?id=USGS_DRO395295</a>                                                                                                                                                                                                                                                                                                                                                                                                                                                                                                                          |
| 4  |                            | USGS. Sam Droege<br><a href="https://www.discoverlife.org/mp/20l?id=USGS_DRO296883">https://www.discoverlife.org/mp/20l?id=USGS_DRO296883</a>                                                                                                                                                                                                                                                                                                                                                                                                                                                                                                                          |
| 5  |                            | USGS. Sam Droege<br><a href="https://www.discoverlife.org/mp/20l?id=USGS_DRO296801">https://www.discoverlife.org/mp/20l?id=USGS_DRO296801</a>                                                                                                                                                                                                                                                                                                                                                                                                                                                                                                                          |
| 6  |                            | USGS. Sam Droege<br><a href="https://www.discoverlife.org/mp/20l?id=USGS_DRO297058">https://www.discoverlife.org/mp/20l?id=USGS_DRO297058</a>                                                                                                                                                                                                                                                                                                                                                                                                                                                                                                                          |
| 7  |                            | iNaturalist.org: iNaturalist research-grade observations<br><a href="https://www.discoverlife.org/mp/20l?id=INAT18875352">https://www.discoverlife.org/mp/20l?id=INAT18875352</a>                                                                                                                                                                                                                                                                                                                                                                                                                                                                                      |
| 8  |                            | USGS. Sam Droege<br><a href="https://www.discoverlife.org/mp/20l?id=USGS_DRO299800">https://www.discoverlife.org/mp/20l?id=USGS_DRO299800</a>                                                                                                                                                                                                                                                                                                                                                                                                                                                                                                                          |
| 9  |                            | USGS. Sam Droege<br><a href="https://www.discoverlife.org/mp/20l?id=USGS_DRO297262">https://www.discoverlife.org/mp/20l?id=USGS_DRO297262</a>                                                                                                                                                                                                                                                                                                                                                                                                                                                                                                                          |
| 10 |                            | iNaturalist.org: iNaturalist research-grade observations<br><a href="https://www.discoverlife.org/mp/20l?id=INAT14505178">https://www.discoverlife.org/mp/20l?id=INAT14505178</a>                                                                                                                                                                                                                                                                                                                                                                                                                                                                                      |
| 11 |                            | USGS. Sam Droege<br><a href="https://www.discoverlife.org/mp/20l?id=USGS_DRO373639">https://www.discoverlife.org/mp/20l?id=USGS_DRO373639</a>                                                                                                                                                                                                                                                                                                                                                                                                                                                                                                                          |
| 12 |                            | USGS. Sam Droege<br><a href="https://www.discoverlife.org/mp/20l?id=USGS_DRO373652">https://www.discoverlife.org/mp/20l?id=USGS_DRO373652</a>                                                                                                                                                                                                                                                                                                                                                                                                                                                                                                                          |
| 13 |                            | USGS. Sam Droege<br><a href="https://www.discoverlife.org/mp/20l?id=USGS_DRO375096">https://www.discoverlife.org/mp/20l?id=USGS_DRO375096</a>                                                                                                                                                                                                                                                                                                                                                                                                                                                                                                                          |
| 14 |                            | USGS. Sam Droege<br><a href="https://www.discoverlife.org/mp/20l?id=USGS_DRO376362">https://www.discoverlife.org/mp/20l?id=USGS_DRO376362</a>                                                                                                                                                                                                                                                                                                                                                                                                                                                                                                                          |
| 15 |                            | USGS. Sam Droege<br><a href="https://www.discoverlife.org/mp/20l?id=USGS_DRO375005">https://www.discoverlife.org/mp/20l?id=USGS_DRO375005</a>                                                                                                                                                                                                                                                                                                                                                                                                                                                                                                                          |
| 16 |                            | USGS. Sam Droege<br><a href="https://www.discoverlife.org/mp/20l?id=USGS_DRO376308">https://www.discoverlife.org/mp/20l?id=USGS_DRO376308</a>                                                                                                                                                                                                                                                                                                                                                                                                                                                                                                                          |
| 17 |                            | USGS. Sam Droege<br><a href="https://www.discoverlife.org/mp/20l?id=USGS_DRO374902">https://www.discoverlife.org/mp/20l?id=USGS_DRO374902</a>                                                                                                                                                                                                                                                                                                                                                                                                                                                                                                                          |
| 18 |                            | USGS. Sam Droege<br><a href="https://www.discoverlife.org/mp/20l?id=USGS_DRO374902">https://www.discoverlife.org/mp/20l?id=USGS_DRO374902</a>                                                                                                                                                                                                                                                                                                                                                                                                                                                                                                                          |
| 19 |                            | USGS. Sam Droege<br><a href="https://www.discoverlife.org/mp/20l?id=USGS_DRO333603">https://www.discoverlife.org/mp/20l?id=USGS_DRO333603</a>                                                                                                                                                                                                                                                                                                                                                                                                                                                                                                                          |
| 20 |                            | USGS. Sam Droege<br><a href="https://www.discoverlife.org/mp/20l?id=USGS_DRO374964">https://www.discoverlife.org/mp/20l?id=USGS_DRO374964</a><br>USGS. Sam Droege<br><a href="https://www.discoverlife.org/mp/20l?id=USGS_DRO374158">https://www.discoverlife.org/mp/20l?id=USGS_DRO374158</a><br>iNaturalist.org: iNaturalist research-grade observations<br><a href="https://www.discoverlife.org/mp/20l?id=INAT18533202">https://www.discoverlife.org/mp/20l?id=INAT18533202</a><br>iNaturalist.org: iNaturalist research-grade observations<br><a href="https://www.discoverlife.org/mp/20l?id=INAT5052542">https://www.discoverlife.org/mp/20l?id=INAT5052542</a> |

|                                   |                                                                                                                                                                                                                                                                                                                                                                                                                                                                                                                                                                                                                                                                                                                                                                                                                                                                                                                                                                                                                                                                                                                                                                                                                                                                                                                                                                                                                                                                                                        |
|-----------------------------------|--------------------------------------------------------------------------------------------------------------------------------------------------------------------------------------------------------------------------------------------------------------------------------------------------------------------------------------------------------------------------------------------------------------------------------------------------------------------------------------------------------------------------------------------------------------------------------------------------------------------------------------------------------------------------------------------------------------------------------------------------------------------------------------------------------------------------------------------------------------------------------------------------------------------------------------------------------------------------------------------------------------------------------------------------------------------------------------------------------------------------------------------------------------------------------------------------------------------------------------------------------------------------------------------------------------------------------------------------------------------------------------------------------------------------------------------------------------------------------------------------------|
|                                   | iNaturalist.org: iNaturalist research-grade observations<br><a href="https://www.discoverlife.org/mp/20l?id=INAT28843815">https://www.discoverlife.org/mp/20l?id=INAT28843815</a>                                                                                                                                                                                                                                                                                                                                                                                                                                                                                                                                                                                                                                                                                                                                                                                                                                                                                                                                                                                                                                                                                                                                                                                                                                                                                                                      |
| <i>Lasioglossum impavidum</i>     | USGS. Sam Droege<br><a href="https://www.discoverlife.org/mp/20l?id=USGS_DRO374087">https://www.discoverlife.org/mp/20l?id=USGS_DRO374087</a><br>USGS. Sam Droege<br><a href="https://www.discoverlife.org/mp/20l?id=USGS_DRO333606">https://www.discoverlife.org/mp/20l?id=USGS_DRO333606</a><br>USGS. Sam Droege<br><a href="https://www.discoverlife.org/mp/20l?id=USGS_DRO374961">https://www.discoverlife.org/mp/20l?id=USGS_DRO374961</a><br>USGS. Sam Droege<br>iNaturalist.org: iNaturalist research-grade observations<br><a href="https://www.discoverlife.org/mp/20l?id=INAT17437721">https://www.discoverlife.org/mp/20l?id=INAT17437721</a>                                                                                                                                                                                                                                                                                                                                                                                                                                                                                                                                                                                                                                                                                                                                                                                                                                               |
| <i>Lasioglossum microlepoides</i> | USGS. Sam Droege<br><a href="https://www.discoverlife.org/mp/20l?id=USGS_DRO296796">https://www.discoverlife.org/mp/20l?id=USGS_DRO296796</a><br>USGS. Sam Droege<br><a href="https://www.discoverlife.org/mp/20l?id=USGS_DRO296855">https://www.discoverlife.org/mp/20l?id=USGS_DRO296855</a><br>USGS. Sam Droege<br><a href="https://www.discoverlife.org/mp/20l?id=USGS_DRO297052">https://www.discoverlife.org/mp/20l?id=USGS_DRO297052</a><br>USGS. Sam Droege<br><a href="https://www.discoverlife.org/mp/20l?id=USGS_DRO301521">https://www.discoverlife.org/mp/20l?id=USGS_DRO301521</a><br>USGS. Sam Droege<br><a href="https://www.discoverlife.org/mp/20l?id=USGS_DRO301641">https://www.discoverlife.org/mp/20l?id=USGS_DRO301641</a><br>USGS. Sam Droege<br><a href="https://www.discoverlife.org/mp/20l?id=USGS_DRO296895">https://www.discoverlife.org/mp/20l?id=USGS_DRO296895</a><br>USGS. Sam Droege<br><a href="https://www.discoverlife.org/mp/20l?id=USGS_DRO300004">https://www.discoverlife.org/mp/20l?id=USGS_DRO300004</a><br>USGS. Sam Droege<br><a href="https://www.discoverlife.org/mp/20l?id=USGS_DRO297264">https://www.discoverlife.org/mp/20l?id=USGS_DRO297264</a><br>USGS. Sam Droege<br><a href="https://www.discoverlife.org/mp/20l?id=USGS_DRO300195">https://www.discoverlife.org/mp/20l?id=USGS_DRO300195</a><br>USGS. Sam Droege<br><a href="https://www.discoverlife.org/mp/20l?id=USGS_DRO299974">https://www.discoverlife.org/mp/20l?id=USGS_DRO299974</a> |
| <i>Lasioglossum puteulanum</i>    | None                                                                                                                                                                                                                                                                                                                                                                                                                                                                                                                                                                                                                                                                                                                                                                                                                                                                                                                                                                                                                                                                                                                                                                                                                                                                                                                                                                                                                                                                                                   |
| <i>Megachile umbripennis</i>      | iNaturalist.org: iNaturalist research-grade observations<br><a href="https://www.discoverlife.org/mp/20l?id=INAT17499827">https://www.discoverlife.org/mp/20l?id=INAT17499827</a><br>University of California Riverside Entomology Research Museum database<br><a href="https://www.discoverlife.org/mp/20l?id=UCRC_ENT231547">https://www.discoverlife.org/mp/20l?id=UCRC_ENT231547</a><br>iNaturalist.org: iNaturalist research-grade observations<br><a href="https://www.discoverlife.org/mp/20l?id=INAT18512497">https://www.discoverlife.org/mp/20l?id=INAT18512497</a><br>USDA-ARS Bee Biology and Systematics Laboratory: Bee Biology and Systematics Laboratory<br><a href="https://www.discoverlife.org/mp/20l?id=BBSL743780">https://www.discoverlife.org/mp/20l?id=BBSL743780</a><br>USDA-ARS Bee Biology and Systematics Laboratory: Bee Biology and Systematics Laboratory<br><a href="https://www.discoverlife.org/mp/20l?id=BBSL743783">https://www.discoverlife.org/mp/20l?id=BBSL743783</a>                                                                                                                                                                                                                                                                                                                                                                                                                                                                                          |

American Museum of Natural History, Bee Specimen Record database  
[https://www.discoverlife.org/mp/20l?id=AMNH\\_BEE00010195](https://www.discoverlife.org/mp/20l?id=AMNH_BEE00010195)  
 USGS. Sam Droege  
[https://www.discoverlife.org/mp/20l?id=USGS\\_DRO376328](https://www.discoverlife.org/mp/20l?id=USGS_DRO376328)  
 USGS. Sam Droege  
[https://www.discoverlife.org/mp/20l?id=USGS\\_DRO376359](https://www.discoverlife.org/mp/20l?id=USGS_DRO376359)  
 USGS. Sam Droege  
[https://www.discoverlife.org/mp/20l?id=USGS\\_DRO375011](https://www.discoverlife.org/mp/20l?id=USGS_DRO375011)  
 USGS. Sam Droege  
[https://www.discoverlife.org/mp/20l?id=USGS\\_DRO374989](https://www.discoverlife.org/mp/20l?id=USGS_DRO374989)  
 USGS. Sam Droege  
[https://www.discoverlife.org/mp/20l?id=USGS\\_DRO375060](https://www.discoverlife.org/mp/20l?id=USGS_DRO375060)  
 USGS. Sam Droege  
[https://www.discoverlife.org/mp/20l?id=USGS\\_DRO374907](https://www.discoverlife.org/mp/20l?id=USGS_DRO374907)  
 USGS. Sam Droege  
[https://www.discoverlife.org/mp/20l?id=USGS\\_DRO376739](https://www.discoverlife.org/mp/20l?id=USGS_DRO376739)  
 USGS. Sam Droege  
[https://www.discoverlife.org/mp/20l?id=USGS\\_DRO374085](https://www.discoverlife.org/mp/20l?id=USGS_DRO374085)  
 USGS. Sam Droege  
[https://www.discoverlife.org/mp/20l?id=USGS\\_DRO374136](https://www.discoverlife.org/mp/20l?id=USGS_DRO374136)  
 USGS. Sam Droege  
[https://www.discoverlife.org/mp/20l?id=USGS\\_DRO374171](https://www.discoverlife.org/mp/20l?id=USGS_DRO374171)  
 USGS. Sam Droege  
[https://www.discoverlife.org/mp/20l?id=USGS\\_DRO376137](https://www.discoverlife.org/mp/20l?id=USGS_DRO376137)  
 iNaturalist.org: iNaturalist research-grade observations  
<https://www.discoverlife.org/mp/20l?id=INAT11189190>  
 University of Connecticut Insect Collection database  
[https://www.discoverlife.org/mp/20l?id=UCMS\\_ENT00040949](https://www.discoverlife.org/mp/20l?id=UCMS_ENT00040949)  
 University of Connecticut Insect Collection database  
[https://www.discoverlife.org/mp/20l?id=UCMS\\_ENT00040950](https://www.discoverlife.org/mp/20l?id=UCMS_ENT00040950)  
 University of California Riverside Entomology Resaerch Museum database  
[https://www.discoverlife.org/mp/20l?id=UCRC\\_ENT231561](https://www.discoverlife.org/mp/20l?id=UCRC_ENT231561)

---

*Xylocopa  
sonorina*

iNaturalist.org: iNaturalist research-grade observations  
<https://www.discoverlife.org/mp/20l?id=INAT20986503>  
 iNaturalist.org: iNaturalist research-grade observations  
<https://www.discoverlife.org/mp/20l?id=INAT32998580>  
 iNaturalist.org: iNaturalist research-grade observations  
<https://www.discoverlife.org/mp/20l?id=INAT19833559>  
 iNaturalist.org: iNaturalist research-grade observations  
<https://www.discoverlife.org/mp/20l?id=INAT10056255>  
 iNaturalist.org: iNaturalist research-grade observations  
<https://www.discoverlife.org/mp/20l?id=INAT2504994>  
 iNaturalist.org: iNaturalist research-grade observations  
<https://www.discoverlife.org/mp/20l?id=INAT2774328>

iNaturalist.org: iNaturalist research-grade observations  
<https://www.discoverlife.org/mp/20l?id=INAT655652>  
iNaturalist.org: iNaturalist research-grade observations  
<https://www.discoverlife.org/mp/20l?id=INAT4816518>  
American Museum of Natural History, Bee Specimen Record  
database  
[https://www.discoverlife.org/mp/20l?id=AMNH\\_BEE00250591](https://www.discoverlife.org/mp/20l?id=AMNH_BEE00250591)  
American Museum of Natural History, Bee Specimen Record  
database  
[https://www.discoverlife.org/mp/20l?id=AMNH\\_BEE00250589](https://www.discoverlife.org/mp/20l?id=AMNH_BEE00250589)  
USGS Sam Droege  
[https://www.discoverlife.org/mp/20l?id=USGS\\_DRO297062](https://www.discoverlife.org/mp/20l?id=USGS_DRO297062)  
USGS Sam Droege  
[https://www.discoverlife.org/mp/20l?id=USGS\\_DRO296805](https://www.discoverlife.org/mp/20l?id=USGS_DRO296805)  
USGS Sam Droege  
[https://www.discoverlife.org/mp/20l?id=USGS\\_DRO301589](https://www.discoverlife.org/mp/20l?id=USGS_DRO301589)  
USGS Sam Droege  
[https://www.discoverlife.org/mp/20l?id=USGS\\_DRO299585](https://www.discoverlife.org/mp/20l?id=USGS_DRO299585)  
USGS Sam Droege  
[https://www.discoverlife.org/mp/20l?id=USGS\\_DRO297346](https://www.discoverlife.org/mp/20l?id=USGS_DRO297346)  
USGS Sam Droege  
[https://www.discoverlife.org/mp/20l?id=USGS\\_DRO296803](https://www.discoverlife.org/mp/20l?id=USGS_DRO296803)  
USGS Sam Droege  
[https://www.discoverlife.org/mp/20l?id=USGS\\_DRO375002](https://www.discoverlife.org/mp/20l?id=USGS_DRO375002)  
iNaturalist.org: iNaturalist research-grade observations  
<https://www.discoverlife.org/mp/20l?id=INAT35101898>  
iNaturalist.org: iNaturalist research-grade observations  
<https://www.discoverlife.org/mp/20l?id=INAT17555547>  
iNaturalist.org: iNaturalist research-grade observations  
<https://www.discoverlife.org/mp/20l?id=INAT10266972>  
iNaturalist.org: iNaturalist research-grade observations  
<https://www.discoverlife.org/mp/20l?id=INAT9526730>  
iNaturalist.org: iNaturalist research-grade observations  
<https://www.discoverlife.org/mp/20l?id=INAT4052346>  
iNaturalist.org: iNaturalist research-grade observations  
<https://www.discoverlife.org/mp/20l?id=INAT18460274>  
iNaturalist.org: iNaturalist research-grade observations  
<https://www.discoverlife.org/mp/20l?id=INAT2777729>  
iNaturalist.org: iNaturalist research-grade observations  
<https://www.discoverlife.org/mp/20l?id=INAT3991007>  
USGS Sam Droege  
[https://www.discoverlife.org/mp/20l?id=USGS\\_DRO376370](https://www.discoverlife.org/mp/20l?id=USGS_DRO376370)  
USGS Sam Droege  
[https://www.discoverlife.org/mp/20l?id=USGS\\_DRO376754](https://www.discoverlife.org/mp/20l?id=USGS_DRO376754)  
USGS Sam Droege  
[https://www.discoverlife.org/mp/20l?id=USGS\\_DRO374165](https://www.discoverlife.org/mp/20l?id=USGS_DRO374165)

USGS Sam Droege

[https://www.discoverlife.org/mp/20l?id=USGS\\_DRO376740](https://www.discoverlife.org/mp/20l?id=USGS_DRO376740)

USGS Sam Droege

[https://www.discoverlife.org/mp/20l?id=USGS\\_DRO376120](https://www.discoverlife.org/mp/20l?id=USGS_DRO376120)

USGS Sam Droege

[https://www.discoverlife.org/mp/20l?id=USGS\\_DRO376185](https://www.discoverlife.org/mp/20l?id=USGS_DRO376185)

USGS Sam Droege

[https://www.discoverlife.org/mp/20l?id=USGS\\_DRO376389](https://www.discoverlife.org/mp/20l?id=USGS_DRO376389)

USGS Sam Droege

[https://www.discoverlife.org/mp/20l?id=USGS\\_DRO376388](https://www.discoverlife.org/mp/20l?id=USGS_DRO376388)

iNaturalist.org: iNaturalist research-grade observations

<https://www.discoverlife.org/mp/20l?id=INAT35157196>

iNaturalist.org: iNaturalist research-grade observations

<https://www.discoverlife.org/mp/20l?id=INAT262095>

iNaturalist.org: iNaturalist research-grade observations

<https://www.discoverlife.org/mp/20l?id=INAT18147742>

iNaturalist.org: iNaturalist research-grade observations

<https://www.discoverlife.org/mp/20l?id=INAT4438293>

iNaturalist.org: iNaturalist research-grade observations

<https://www.discoverlife.org/mp/20l?id=INAT5054349>

iNaturalist.org: iNaturalist research-grade observations

<https://www.discoverlife.org/mp/20l?id=INAT28845441>

iNaturalist.org: iNaturalist research-grade observations

<https://www.discoverlife.org/mp/20l?id=INAT4245327>

USDA-ARS Bee Biology and Systematics Laboratory: Bee Biology  
and Systematics Laboratory

<https://www.discoverlife.org/mp/20l?id=BBSL802531>

iNaturalist.org: iNaturalist research-grade observations

<https://www.discoverlife.org/mp/20l?id=INAT3967713>

iNaturalist.org: iNaturalist research-grade observations

<https://www.discoverlife.org/mp/20l?id=INAT4245327>

iNaturalist.org: iNaturalist research-grade observations

<https://www.discoverlife.org/mp/20l?id=INAT552487>

---
